# Supplementary material for: Phase III randomized trial of autologous cytokine-induced killer cell immunotherapy for newly diagnosed glioblastoma in korea
Source: PubMed Central journal article supplement (PMC5351686; doi:10.18632/oncotarget.12273), 2016-09-27
Supplement: oncotarget-08-7003-s001.pdf [file oncotarget-08-7003-s001.pdf]

**Table S1.** Progression free survival (PFS)(PP set=140 patients)

|                                     | CIK immunotherapy group<br>(N=69) | Control group<br>(N=71) |
|-------------------------------------|-----------------------------------|-------------------------|
| Incidence rate (Death or PD), n(%)  | 60(86.957%)                       | 61(85.915%)             |
| PD, n(%)                            | 59(85.507%)                       | 60(84.507%)             |
| Death, n(%)                         | 1(1.449%)                         | 1(1.408%)               |
| Progression-Free survival rate (%)  |                                   |                         |
| 12 months(%) [95% CI]               | 28.99 [18.85, 39.89]              | 19.72 [11.44, 29.64]    |
| 18 months(%) [95% CI]               | 26.09 [16.43, 36.79]              | 18.08[11.44, 29.64]     |
| 24 months(%) [95% CI]               | 18.31 [10.15, 28.37]              | 12.65 [5.95, 22.00]     |
| Progression-Free survival, Mean±SE  | 13.252±1.533                      | 7.700±0.760             |
| 75% PFS [95% CI]                    | 19.243 [9.737, 26.447]            | 8.586 [8.026, 19.474]   |
| 50% PFS [95% CI]                    | 8.092 [7.072, 8.882]              | 5.362 [3.980, 7.928]    |
| 25% PFS [95% CI]                    | 5.263 [2.697, 5.822]              | 2.467 [2.336, 2.763]    |
| p-value <sup>1)</sup>               | 0.0218#                           |                         |
| Hazard ratio [90% CI] <sup>2)</sup> | 0.693 [0.512, 0.937]              |                         |

\* Progression-free survival=Diagnosis date of disease progression by MRI, date of death or date of off-study - Randomization date

<sup>1)</sup> Results by one-sided Log-rank test

<sup>2)</sup> Presented as the result of one-sided test

# P-value<0.05

**Table S2.** Overall survival (OS)(PP set=140 patients)

|                                     | CIK immunotherapy group<br>(N=69) | Control group (N=71)    |
|-------------------------------------|-----------------------------------|-------------------------|
| Incidence rate(Death), n(%)         | 42(60.870%)                       | 43(60.563%)             |
| Overall Survival rate(%)            |                                   |                         |
| 12 months(%) [95% CI]               | 80.54 [68.86, 88.21]              | 76.34 [64.30, 84.79]    |
| 18 months(%) [95% CI]               | 59.41[46.29, 70.33]               | 43.62[31.11, 55.46]     |
| 24 months(%) [95% CI]               | 40.92 [28.26, 53.16]              | 39.56 [27.21, 51.64]    |
| Survival, Mean±SE                   | 22.669±1.329                      | 19.945±1.198            |
| 75% Survival [95% CI]               | - [28.586, -]                     | - [25.428, -]           |
| 50% Survival [95% CI]               | 23.059 [17.204, 28.586]           | 16.875 [13.915, 24.211] |
| 25% Survival [95% CI]               | 14.276 [9.013, 17.204]            | 12.007 [10.526, 13.651] |
| p-value <sup>1)</sup>               |                                   | 0.4221                  |
| Hazard ratio [90% CI] <sup>2)</sup> |                                   | 0.840 [0.548, 1.287]    |

\* Overall Survival=Date of death or date of off-study - Randomization date

<sup>1)</sup> Results by Log-rank test

<sup>2)</sup> Presented as the result of one-sided test

**Table S3.** Response Rate(Objective Response rate, Disease Control Rate)

Treatment response rate

| Treatment response      | CIK group |          | 95% C.I. |         | Control group |          | 95% C.I. |         | p-value        |
|-------------------------|-----------|----------|----------|---------|---------------|----------|----------|---------|----------------|
|                         | n         | (%)      | [min,    | max]    | n             | (%)      | [min,    | max]    |                |
| ITT set                 | N= 91     |          |          |         | N= 89         |          |          |         |                |
| n                       | 85        |          |          |         | 82            |          |          |         |                |
| ORR                     | 23        | (27.059) | [17.610, | 36.500] | 13            | (15.854) | [7.950,  | 23.760] | 0.0783+        |
| DCR                     | 70        | (82.353) | [74.250, | 90.460] | 52            | (63.415) | [52.990, | 73.840] | <b>0.0058+</b> |
| Complete response(CR)   | 7         | (8.235)  |          |         | 4             | (4.878)  |          |         |                |
| Partial response(PR)    | 16        | (18.824) |          |         | 9             | (10.976) |          |         |                |
| No change(NC)           | 47        | (55.294) |          |         | 39            | (47.561) |          |         |                |
| Progressive disease(PD) | 15        | (17.647) |          |         | 30            | (36.585) |          |         |                |

ORR=CR+PR

DCR=CR+PR+SD

t: Pearson's chi-square test

|                   |           |     |          |     |          |     |          |     |          |     |          |     |          |     |          |     |
|-------------------|-----------|-----|----------|-----|----------|-----|----------|-----|----------|-----|----------|-----|----------|-----|----------|-----|
| Arthralgia        | 6(7.059)  | [6] | 0(0.000) | [0] | 0(0.000) | [0] | 0(0.000) | [0] | 8(9.412) | [8] | 0(0.000) | [0] | 0(0.000) | [0] | 0(0.000) | [0] |
| Back pain         | 9(10.588) | [9] | 2(2.353) | [2] | 1(1.177) | [1] | 1(1.177) | [1] | 5(5.882) | [5] | 0(0.000) | [0] | 0(0.000) | [0] | 0(0.000) | [0] |
| Myalgia           | 5(5.882)  | [5] | 0(0.000) | [0] | 0(0.000) | [0] | 0(0.000) | [0] | 2(2.353) | [2] | 0(0.000) | [0] | 0(0.000) | [0] | 0(0.000) | [0] |
| Muscular weakness | 3(3.529)  | [3] | 0(0.000) | [0] | 0(0.000) | [0] | 0(0.000) | [0] | 2(2.353) | [2] | 0(0.000) | [0] | 0(0.000) | [0] | 0(0.000) | [0] |
| Neck pain         | 4(4.706)  | [4] | 0(0.000) | [0] | 0(0.000) | [0] | 0(0.000) | [0] | 2(2.353) | [2] | 0(0.000) | [0] | 0(0.000) | [0] | 0(0.000) | [0] |
| Flank pain        | 3(3.529)  | [3] | 0(0.000) | [0] | 0(0.000) | [0] | 0(0.000) | [0] | 1(1.177) | [1] | 0(0.000) | [0] | 0(0.000) | [0] | 0(0.000) | [0] |



|                                                        |                   |             |                   |             |                   |             |                 |            |                   |             |                 |            |                 |            |                 |            |
|--------------------------------------------------------|-------------------|-------------|-------------------|-------------|-------------------|-------------|-----------------|------------|-------------------|-------------|-----------------|------------|-----------------|------------|-----------------|------------|
| Clostridium test positive                              | 1(1.177)          | [1]         | 0(0.000)          | [0]         | 0(0.000)          | [0]         | 0(0.000)        | [0]        | 0(0.000)          | [0]         | 0(0.000)        | [0]        | 0(0.000)        | [0]        | 0(0.000)        | [0]        |
| Electrocardiogram QT prolonged                         | 1(1.177)          | [1]         | 0(0.000)          | [0]         | 0(0.000)          | [0]         | 0(0.000)        | [0]        | 0(0.000)          | [0]         | 0(0.000)        | [0]        | 0(0.000)        | [0]        | 0(0.000)        | [0]        |
| Electrocardiogram T wave abnormal                      | 1(1.177)          | [1]         | 0(0.000)          | [0]         | 0(0.000)          | [0]         | 0(0.000)        | [0]        | 0(0.000)          | [0]         | 0(0.000)        | [0]        | 0(0.000)        | [0]        | 0(0.000)        | [0]        |
| Lymphocyte count decreased                             | 1(1.177)          | [1]         | 1(1.177)          | [1]         | 1(1.177)          | [1]         | 0(0.000)        | [0]        | 0(0.000)          | [0]         | 0(0.000)        | [0]        | 0(0.000)        | [0]        | 0(0.000)        | [0]        |
| <b>Respiratory, thoracic and mediastinal disorders</b> | <b>28(32.941)</b> | <b>[46]</b> | <b>3(3.529)</b>   | <b>[4]</b>  | <b>3(3.529)</b>   | <b>[4]</b>  | <b>0(0.000)</b> | <b>[0]</b> | <b>21(24.706)</b> | <b>[33]</b> | <b>2(2.353)</b> | <b>[2]</b> | <b>1(1.177)</b> | <b>[1]</b> | <b>1(1.176)</b> | <b>[1]</b> |
| Cough                                                  | 9(10.588)         | [9]         | 0(0.000)          | [0]         | 0(0.000)          | [0]         | 0(0.000)        | [0]        | 7(8.235)          | [8]         | 0(0.000)        | [0]        | 0(0.000)        | [0]        | 0(0.000)        | [0]        |
| Dyspnoea                                               | 9(10.588)         | [11]        | 2(2.353)          | [2]         | 2(2.353)          | [2]         | 0(0.000)        | [0]        | 5(5.882)          | [5]         | 1(1.177)        | [1]        | 0(0.000)        | [0]        | 1(1.176)        | [1]        |
| Productive cough                                       | 9(10.588)         | [9]         | 0(0.000)          | [0]         | 0(0.000)          | [0]         | 0(0.000)        | [0]        | 4(4.706)          | [5]         | 0(0.000)        | [0]        | 0(0.000)        | [0]        | 0(0.000)        | [0]        |
| Oropharyngeal pain                                     | 5(5.882)          | [5]         | 0(0.000)          | [0]         | 0(0.000)          | [0]         | 0(0.000)        | [0]        | 1(1.177)          | [1]         | 0(0.000)        | [0]        | 0(0.000)        | [0]        | 0(0.000)        | [0]        |
| Rhinorrhoea                                            | 2(2.353)          | [2]         | 0(0.000)          | [0]         | 0(0.000)          | [0]         | 0(0.000)        | [0]        | 3(3.529)          | [3]         | 0(0.000)        | [0]        | 0(0.000)        | [0]        | 0(0.000)        | [0]        |
| Hiccups                                                | 1(1.177)          | [1]         | 0(0.000)          | [0]         | 0(0.000)          | [0]         | 0(0.000)        | [0]        | 2(2.353)          | [5]         | 1(1.177)        | [1]        | 1(1.177)        | [1]        | 0(0.000)        | [0]        |
| Epistaxis                                              | 1(1.177)          | [1]         | 0(0.000)          | [0]         | 0(0.000)          | [0]         | 0(0.000)        | [0]        | 1(1.177)          | [1]         | 0(0.000)        | [0]        | 0(0.000)        | [0]        | 0(0.000)        | [0]        |
| Aspiration                                             | 1(1.177)          | [1]         | 0(0.000)          | [0]         | 0(0.000)          | [0]         | 0(0.000)        | [0]        | 0(0.000)          | [0]         | 0(0.000)        | [0]        | 0(0.000)        | [0]        | 0(0.000)        | [0]        |
| Atelectasis                                            | 1(1.177)          | [1]         | 1(1.177)          | [1]         | 1(1.177)          | [1]         | 0(0.000)        | [0]        | 0(0.000)          | [0]         | 0(0.000)        | [0]        | 0(0.000)        | [0]        | 0(0.000)        | [0]        |
| Bronchitis chronic                                     | 1(1.177)          | [1]         | 0(0.000)          | [0]         | 0(0.000)          | [0]         | 0(0.000)        | [0]        | 0(0.000)          | [0]         | 0(0.000)        | [0]        | 0(0.000)        | [0]        | 0(0.000)        | [0]        |
| Dyspnoea exertional                                    | 1(1.177)          | [1]         | 0(0.000)          | [0]         | 0(0.000)          | [0]         | 0(0.000)        | [0]        | 0(0.000)          | [0]         | 0(0.000)        | [0]        | 0(0.000)        | [0]        | 0(0.000)        | [0]        |
| Emphysema                                              | 0(0.000)          | [0]         | 0(0.000)          | [0]         | 0(0.000)          | [0]         | 0(0.000)        | [0]        | 1(1.177)          | [1]         | 0(0.000)        | [0]        | 0(0.000)        | [0]        | 0(0.000)        | [0]        |
| Haemoptysis                                            | 0(0.000)          | [0]         | 0(0.000)          | [0]         | 0(0.000)          | [0]         | 0(0.000)        | [0]        | 1(1.177)          | [1]         | 0(0.000)        | [0]        | 0(0.000)        | [0]        | 0(0.000)        | [0]        |
| Increased bronchial secretion                          | 0(0.000)          | [0]         | 0(0.000)          | [0]         | 0(0.000)          | [0]         | 0(0.000)        | [0]        | 1(1.177)          | [1]         | 0(0.000)        | [0]        | 0(0.000)        | [0]        | 0(0.000)        | [0]        |
| Pneumonia aspiration                                   | 1(1.177)          | [1]         | 1(1.177)          | [1]         | 1(1.177)          | [1]         | 0(0.000)        | [0]        | 0(0.000)          | [0]         | 0(0.000)        | [0]        | 0(0.000)        | [0]        | 0(0.000)        | [0]        |
| Pneumothorax                                           | 0(0.000)          | [0]         | 0(0.000)          | [0]         | 0(0.000)          | [0]         | 0(0.000)        | [0]        | 1(1.177)          | [1]         | 0(0.000)        | [0]        | 0(0.000)        | [0]        | 0(0.000)        | [0]        |
| Pulmonary hypertension                                 | 1(1.177)          | [1]         | 0(0.000)          | [0]         | 0(0.000)          | [0]         | 0(0.000)        | [0]        | 0(0.000)          | [0]         | 0(0.000)        | [0]        | 0(0.000)        | [0]        | 0(0.000)        | [0]        |
| Pulmonary oedema                                       | 1(1.177)          | [1]         | 0(0.000)          | [0]         | 0(0.000)          | [0]         | 0(0.000)        | [0]        | 0(0.000)          | [0]         | 0(0.000)        | [0]        | 0(0.000)        | [0]        | 0(0.000)        | [0]        |
| Rhinitis allergic                                      | 0(0.000)          | [0]         | 0(0.000)          | [0]         | 0(0.000)          | [0]         | 0(0.000)        | [0]        | 1(1.177)          | [1]         | 0(0.000)        | [0]        | 0(0.000)        | [0]        | 0(0.000)        | [0]        |
| Sleep apnoea syndrome                                  | 1(1.177)          | [1]         | 0(0.000)          | [0]         | 0(0.000)          | [0]         | 0(0.000)        | [0]        | 0(0.000)          | [0]         | 0(0.000)        | [0]        | 0(0.000)        | [0]        | 0(0.000)        | [0]        |
| <b>Blood and lymphatic system disorders</b>            | <b>24(28.235)</b> | <b>[58]</b> | <b>10(11.765)</b> | <b>[18]</b> | <b>10(11.765)</b> | <b>[16]</b> | <b>1(1.177)</b> | <b>[2]</b> | <b>16(18.824)</b> | <b>[30]</b> | <b>4(4.706)</b> | <b>[5]</b> | <b>4(4.706)</b> | <b>[5]</b> | <b>0(0.000)</b> | <b>[0]</b> |
| Thrombocytopenia                                       | 13(15.294)        | [15]        | 2(2.353)          | [2]         | 1(1.177)          | [1]         | 1(1.177)        | [1]        | 12(14.118)        | [13]        | 1(1.177)        | [1]        | 1(1.177)        | [1]        | 0(0.000)        | [0]        |

|                                        |                   |             |                 |            |                 |            |                 |            |                   |             |                 |            |                 |            |                 |            |
|----------------------------------------|-------------------|-------------|-----------------|------------|-----------------|------------|-----------------|------------|-------------------|-------------|-----------------|------------|-----------------|------------|-----------------|------------|
| Leukopenia                             | 16(18.824)        | [26]        | 2(2.353)        | [2]        | 1(1.177)        | [1]        | 1(1.177)        | [1]        | 7(8.235)          | [8]         | 2(2.353)        | [2]        | 2(2.353)        | [2]        | 0(0.000)        | [0]        |
| Neutropenia                            | 4(4.706)          | [8]         | 3(3.529)        | [7]        | 3(3.529)        | [7]        | 0(0.000)        | [0]        | 3(3.529)          | [3]         | 0(0.000)        | [0]        | 0(0.000)        | [0]        | 0(0.000)        | [0]        |
| Lymphopenia                            | 4(4.706)          | [6]         | 4(4.706)        | [5]        | 4(4.706)        | [5]        | 0(0.000)        | [0]        | 2(2.353)          | [3]         | 1(1.177)        | [2]        | 1(1.177)        | [2]        | 0(0.000)        | [0]        |
| Anaemia                                | 1(1.177)          | [1]         | 0(0.000)        | [0]        | 0(0.000)        | [0]        | 0(0.000)        | [0]        | 2(2.353)          | [2]         | 0(0.000)        | [0]        | 0(0.000)        | [0]        | 0(0.000)        | [0]        |
| Disseminated intravascular coagulation | 2(2.353)          | [2]         | 2(2.353)        | [2]        | 2(2.353)        | [2]        | 0(0.000)        | [0]        | 0(0.000)          | [0]         | 0(0.000)        | [0]        | 0(0.000)        | [0]        | 0(0.000)        | [0]        |
| Splenomegaly                           | 0(0.000)          | [0]         | 0(0.000)        | [0]        | 0(0.000)        | [0]        | 0(0.000)        | [0]        | 1(1.177)          | [1]         | 0(0.000)        | [0]        | 0(0.000)        | [0]        | 0(0.000)        | [0]        |
| <b>Eye disorders</b>                   | <b>19(22.353)</b> | <b>[21]</b> | <b>1(1.177)</b> | <b>[1]</b> | <b>1(1.177)</b> | <b>[1]</b> | <b>0(0.000)</b> | <b>[0]</b> | <b>(24.706)</b>   | <b>[26]</b> | <b>0(0.000)</b> | <b>[0]</b> | <b>0(0.000)</b> | <b>[0]</b> | <b>0(0.000)</b> | <b>[0]</b> |
| Dry eye                                | 6(7.059)          | [6]         | 0(0.000)        | [0]        | 0(0.000)        | [0]        | 0(0.000)        | [0]        | 2(2.353)          | [2]         | 0(0.000)        | [0]        | 0(0.000)        | [0]        | 0(0.000)        | [0]        |
| Eye pain                               | 1(1.177)          | [1]         | 0(0.000)        | [0]        | 0(0.000)        | [0]        | 0(0.000)        | [0]        | 6(7.059)          | [6]         | 0(0.000)        | [0]        | 0(0.000)        | [0]        | 0(0.000)        | [0]        |
| Diplopia                               | 1(1.177)          | [1]         | 0(0.000)        | [0]        | 0(0.000)        | [0]        | 0(0.000)        | [0]        | 3(3.529)          | [3]         | 0(0.000)        | [0]        | 0(0.000)        | [0]        | 0(0.000)        | [0]        |
| Eyelid oedema                          | 0(0.000)          | [0]         | 0(0.000)        | [0]        | 0(0.000)        | [0]        | 0(0.000)        | [0]        | 4(4.706)          | [4]         | 0(0.000)        | [0]        | 0(0.000)        | [0]        | 0(0.000)        | [0]        |
| Visual impairment                      | 2(2.353)          | [2]         | 0(0.000)        | [0]        | 0(0.000)        | [0]        | 0(0.000)        | [0]        | 3(3.529)          | [3]         | 0(0.000)        | [0]        | 0(0.000)        | [0]        | 0(0.000)        | [0]        |
| Conjunctivitis                         | 1(1.177)          | [1]         | 0(0.000)        | [0]        | 0(0.000)        | [0]        | 0(0.000)        | [0]        | 2(2.353)          | [2]         | 0(0.000)        | [0]        | 0(0.000)        | [0]        | 0(0.000)        | [0]        |
| Foreign body sensation in eyes         | 1(1.177)          | [1]         | 0(0.000)        | [0]        | 0(0.000)        | [0]        | 0(0.000)        | [0]        | 1(1.177)          | [1]         | 0(0.000)        | [0]        | 0(0.000)        | [0]        | 0(0.000)        | [0]        |
| Ocular hyperaemia                      | 2(2.353)          | [2]         | 0(0.000)        | [0]        | 0(0.000)        | [0]        | 0(0.000)        | [0]        | 0(0.000)          | [0]         | 0(0.000)        | [0]        | 0(0.000)        | [0]        | 0(0.000)        | [0]        |
| Vision blurred                         | 1(1.177)          | [1]         | 0(0.000)        | [0]        | 0(0.000)        | [0]        | 0(0.000)        | [0]        | 1(1.177)          | [1]         | 0(0.000)        | [0]        | 0(0.000)        | [0]        | 0(0.000)        | [0]        |
| Cataract                               | 1(1.177)          | [1]         | 1(1.177)        | [1]        | 1(1.177)        | [1]        | 0(0.000)        | [0]        | 0(0.000)          | [0]         | 0(0.000)        | [0]        | 0(0.000)        | [0]        | 0(0.000)        | [0]        |
| Corneal erosion                        | 0(0.000)          | [0]         | 0(0.000)        | [0]        | 0(0.000)        | [0]        | 0(0.000)        | [0]        | 1(1.177)          | [1]         | 0(0.000)        | [0]        | 0(0.000)        | [0]        | 0(0.000)        | [0]        |
| Eye inflammation                       | 1(1.177)          | [1]         | 0(0.000)        | [0]        | 0(0.000)        | [0]        | 0(0.000)        | [0]        | 0(0.000)          | [0]         | 0(0.000)        | [0]        | 0(0.000)        | [0]        | 0(0.000)        | [0]        |
| Eye oedema                             | 1(1.177)          | [1]         | 0(0.000)        | [0]        | 0(0.000)        | [0]        | 0(0.000)        | [0]        | 0(0.000)          | [0]         | 0(0.000)        | [0]        | 0(0.000)        | [0]        | 0(0.000)        | [0]        |
| Eye swelling                           | 0(0.000)          | [0]         | 0(0.000)        | [0]        | 0(0.000)        | [0]        | 0(0.000)        | [0]        | 1(1.177)          | [1]         | 0(0.000)        | [0]        | 0(0.000)        | [0]        | 0(0.000)        | [0]        |
| Glare                                  | 1(1.177)          | [1]         | 0(0.000)        | [0]        | 0(0.000)        | [0]        | 0(0.000)        | [0]        | 0(0.000)          | [0]         | 0(0.000)        | [0]        | 0(0.000)        | [0]        | 0(0.000)        | [0]        |
| Lacrimation increased                  | 1(1.177)          | [1]         | 0(0.000)        | [0]        | 0(0.000)        | [0]        | 0(0.000)        | [0]        | 0(0.000)          | [0]         | 0(0.000)        | [0]        | 0(0.000)        | [0]        | 0(0.000)        | [0]        |
| Ocular discomfort                      | 0(0.000)          | [0]         | 0(0.000)        | [0]        | 0(0.000)        | [0]        | 0(0.000)        | [0]        | 1(1.177)          | [1]         | 0(0.000)        | [0]        | 0(0.000)        | [0]        | 0(0.000)        | [0]        |
| Retinal degeneration                   | 1(1.177)          | [1]         | 0(0.000)        | [0]        | 0(0.000)        | [0]        | 0(0.000)        | [0]        | 0(0.000)          | [0]         | 0(0.000)        | [0]        | 0(0.000)        | [0]        | 0(0.000)        | [0]        |
| Visual acuity reduced                  | 0(0.000)          | [0]         | 0(0.000)        | [0]        | 0(0.000)        | [0]        | 0(0.000)        | [0]        | 1(1.177)          | [1]         | 0(0.000)        | [0]        | 0(0.000)        | [0]        | 0(0.000)        | [0]        |
| <b>Renal and urinary disorders</b>     | <b>18(21.177)</b> | <b>[26]</b> | <b>3(3.529)</b> | <b>[3]</b> | <b>3(3.529)</b> | <b>[3]</b> | <b>0(0.000)</b> | <b>[0]</b> | <b>12(14.118)</b> | <b>[13]</b> | <b>1(1.177)</b> | <b>[1]</b> | <b>1(1.177)</b> | <b>[1]</b> | <b>0(0.000)</b> | <b>[0]</b> |
| Urinary incontinence                   | 3(3.529)          | [3]         | 0(0.000)        | [0]        | 0(0.000)        | [0]        | 0(0.000)        | [0]        | 5(5.882)          | [5]         | 0(0.000)        | [0]        | 0(0.000)        | [0]        | 0(0.000)        | [0]        |

|                                                       |                   |             |                 |            |                 |            |                 |            |          |                |                 |                 |                 |                 |                 |                 |            |
|-------------------------------------------------------|-------------------|-------------|-----------------|------------|-----------------|------------|-----------------|------------|----------|----------------|-----------------|-----------------|-----------------|-----------------|-----------------|-----------------|------------|
| Dysuria                                               | 6(7.059)          | [6]         | 1(1.177)        | [1]        | 1(1.177)        | [1]        | 0(0.000)        | [0]        | 1(1.177) | [1]            | 0(0.000)        | [0]             | 0(0.000)        | [0]             | 0(0.000)        | [0]             |            |
| Haematuria                                            | 5(5.882)          | [5]         | 0(0.000)        | [0]        | 0(0.000)        | [0]        | 0(0.000)        | [0]        | 1(1.177) | [1]            | 0(0.000)        | [0]             | 0(0.000)        | [0]             | 0(0.000)        | [0]             |            |
| Micturition disorder                                  | 2(2.353)          | [2]         | 0(0.000)        | [0]        | 0(0.000)        | [0]        | 0(0.000)        | [0]        | 1(1.177) | [1]            | 0(0.000)        | [0]             | 0(0.000)        | [0]             | 0(0.000)        | [0]             |            |
| Pollakiuria                                           | 2(2.353)          | [2]         | 0(0.000)        | [0]        | 0(0.000)        | [0]        | 0(0.000)        | [0]        | 1(1.177) | [1]            | 0(0.000)        | [0]             | 0(0.000)        | [0]             | 0(0.000)        | [0]             |            |
| Neurogenic bladder                                    | 0(0.000)          | [0]         | 0(0.000)        | [0]        | 0(0.000)        | [0]        | 0(0.000)        | [0]        | 2(2.353) | [2]            | 1(1.177)        | [1]             | 1(1.177)        | [1]             | 0(0.000)        | [0]             |            |
| Urinary retention                                     | 2(2.353)          | [2]         | 0(0.000)        | [0]        | 0(0.000)        | [0]        | 0(0.000)        | [0]        | 0(0.000) | [0]            | 0(0.000)        | [0]             | 0(0.000)        | [0]             | 0(0.000)        | [0]             |            |
| Calculus bladder                                      | 1(1.177)          | [1]         | 0(0.000)        | [0]        | 0(0.000)        | [0]        | 0(0.000)        | [0]        | 0(0.000) | [0]            | 0(0.000)        | [0]             | 0(0.000)        | [0]             | 0(0.000)        | [0]             |            |
| Enuresis                                              | 0(0.000)          | [0]         | 0(0.000)        | [0]        | 0(0.000)        | [0]        | 0(0.000)        | [0]        | 1(1.177) | [1]            | 0(0.000)        | [0]             | 0(0.000)        | [0]             | 0(0.000)        | [0]             |            |
| Glycosuria                                            | 1(1.177)          | [1]         | 0(0.000)        | [0]        | 0(0.000)        | [0]        | 0(0.000)        | [0]        | 0(0.000) | [0]            | 0(0.000)        | [0]             | 0(0.000)        | [0]             | 0(0.000)        | [0]             |            |
| Hypertonic bladder                                    | 1(1.177)          | [1]         | 0(0.000)        | [0]        | 0(0.000)        | [0]        | 0(0.000)        | [0]        | 0(0.000) | [0]            | 0(0.000)        | [0]             | 0(0.000)        | [0]             | 0(0.000)        | [0]             |            |
| Micturition urgency                                   | 0(0.000)          | [0]         | 0(0.000)        | [0]        | 0(0.000)        | [0]        | 0(0.000)        | [0]        | 1(1.177) | [1]            | 0(0.000)        | [0]             | 0(0.000)        | [0]             | 0(0.000)        | [0]             |            |
| Oliguria                                              | 1(1.177)          | [1]         | 0(0.000)        | [0]        | 0(0.000)        | [0]        | 0(0.000)        | [0]        | 0(0.000) | [0]            | 0(0.000)        | [0]             | 0(0.000)        | [0]             | 0(0.000)        | [0]             |            |
| Renal failure acute                                   | 1(1.177)          | [1]         | 1(1.177)        | [1]        | 1(1.177)        | [1]        | 0(0.000)        | [0]        | 0(0.000) | [0]            | 0(0.000)        | [0]             | 0(0.000)        | [0]             | 0(0.000)        | [0]             |            |
| Renal tubular necrosis                                | 1(1.177)          | [1]         | 1(1.177)        | [1]        | 1(1.177)        | [1]        | 0(0.000)        | [0]        | 0(0.000) | [0]            | 0(0.000)        | [0]             | 0(0.000)        | [0]             | 0(0.000)        | [0]             |            |
| <b>Psychiatric disorders</b>                          | <b>14(16.471)</b> | <b>[17]</b> | <b>0(0.000)</b> | <b>[0]</b> | <b>0(0.000)</b> | <b>[0]</b> | <b>0(0.000)</b> | <b>[0]</b> | <b>1</b> | <b>6</b>       | <b>(18.824)</b> | <b>[22]</b>     | <b>0(0.000)</b> | <b>[0]</b>      | <b>0(0.000)</b> | <b>[0]</b>      |            |
| Insomnia                                              | 7(8.235)          | [9]         | 0(0.000)        | [0]        | 0(0.000)        | [0]        | 0(0.000)        | [0]        | 7(8.235) | [7]            | 0(0.000)        | [0]             | 0(0.000)        | [0]             | 0(0.000)        | [0]             |            |
| Depression                                            | 4(4.706)          | [4]         | 0(0.000)        | [0]        | 0(0.000)        | [0]        | 0(0.000)        | [0]        | 6        | (7.059)        | [7]             | 0(0.000)        | [0]             | 0(0.000)        | [0]             | 0(0.000)        | [0]        |
| Mood altered                                          | 1(1.177)          | [1]         | 0(0.000)        | [0]        | 0(0.000)        | [0]        | 0(0.000)        | [0]        | 2(2.353) | [2]            | 0(0.000)        | [0]             | 0(0.000)        | [0]             | 0(0.000)        | [0]             |            |
| Psychotic disorder                                    | 0(0.000)          | [0]         | 0(0.000)        | [0]        | 0(0.000)        | [0]        | 0(0.000)        | [0]        | 2(2.353) | [2]            | 0(0.000)        | [0]             | 0(0.000)        | [0]             | 0(0.000)        | [0]             |            |
| Anxiety disorder                                      | 0(0.000)          | [0]         | 0(0.000)        | [0]        | 0(0.000)        | [0]        | 0(0.000)        | [0]        | 1(1.177) | [1]            | 0(0.000)        | [0]             | 0(0.000)        | [0]             | 0(0.000)        | [0]             |            |
| Depressed mood                                        | 1(1.177)          | [1]         | 0(0.000)        | [0]        | 0(0.000)        | [0]        | 0(0.000)        | [0]        | 1        | (1.177)        | [1]             | 0(0.000)        | [0]             | 0(0.000)        | [0]             | 0(0.000)        | [0]        |
| Personality change                                    | 0(0.000)          | [0]         | 0(0.000)        | [0]        | 0(0.000)        | [0]        | 0(0.000)        | [0]        | 1(1.177) | [1]            | 0(0.000)        | [0]             | 0(0.000)        | [0]             | 0(0.000)        | [0]             |            |
| Personality disorder                                  | 0(0.000)          | [0]         | 0(0.000)        | [0]        | 0(0.000)        | [0]        | 0(0.000)        | [0]        | 1(1.177) | [1]            | 0(0.000)        | [0]             | 0(0.000)        | [0]             | 0(0.000)        | [0]             |            |
| Sleep disorder                                        | 1(1.177)          | [2]         | 0(0.000)        | [0]        | 0(0.000)        | [0]        | 0(0.000)        | [0]        | 0(0.000) | [0]            | 0(0.000)        | [0]             | 0(0.000)        | [0]             | 0(0.000)        | [0]             |            |
| <b>Injury, poisoning and procedural complications</b> | <b>16(18.824)</b> | <b>[22]</b> | <b>0(0.000)</b> | <b>[0]</b> | <b>0(0.000)</b> | <b>[0]</b> | <b>0(0.000)</b> | <b>[0]</b> | <b>7</b> | <b>(8.235)</b> | <b>[8]</b>      | <b>0(0.000)</b> | <b>[0]</b>      | <b>0(0.000)</b> | <b>[0]</b>      | <b>0(0.000)</b> | <b>[0]</b> |
| Excoriation                                           | 4(4.706)          | [4]         | 0(0.000)        | [0]        | 0(0.000)        | [0]        | 0(0.000)        | [0]        | 2(2.353) | [2]            | 0(0.000)        | [0]             | 0(0.000)        | [0]             | 0(0.000)        | [0]             |            |
| Ear abrasion                                          | 3(3.529)          | [3]         | 0(0.000)        | [0]        | 0(0.000)        | [0]        | 0(0.000)        | [0]        | 1(1.177) | [1]            | 0(0.000)        | [0]             | 0(0.000)        | [0]             | 0(0.000)        | [0]             |            |
| Procedural pain                                       | 1(1.177)          | [1]         | 0(0.000)        | [0]        | 0(0.000)        | [0]        | 0(0.000)        | [0]        | 2(2.353) | [2]            | 0(0.000)        | [0]             | 0(0.000)        | [0]             | 0(0.000)        | [0]             |            |

|                                                 |                 |             |                 |            |                 |            |                 |            |                 |            |                 |            |                 |            |                 |            |
|-------------------------------------------------|-----------------|-------------|-----------------|------------|-----------------|------------|-----------------|------------|-----------------|------------|-----------------|------------|-----------------|------------|-----------------|------------|
| Contusion                                       | 1(1.177)        | [3]         | 0(0.000)        | [0]        | 0(0.000)        | [0]        | 0(0.000)        | [0]        | 1(1.177)        | [1]        | 0(0.000)        | [0]        | 0(0.000)        | [0]        | 0(0.000)        | [0]        |
| Laceration                                      | 2(2.353)        | [2]         | 0(0.000)        | [0]        | 0(0.000)        | [0]        | 0(0.000)        | [0]        | 0(0.000)        | [0]        | 0(0.000)        | [0]        | 0(0.000)        | [0]        | 0(0.000)        | [0]        |
| Rib fracture                                    | 2(2.353)        | [2]         | 0(0.000)        | [0]        | 0(0.000)        | [0]        | 0(0.000)        | [0]        | 0(0.000)        | [0]        | 0(0.000)        | [0]        | 0(0.000)        | [0]        | 0(0.000)        | [0]        |
| Concussion                                      | 1(1.177)        | [1]         | 0(0.000)        | [0]        | 0(0.000)        | [0]        | 0(0.000)        | [0]        | 0(0.000)        | [0]        | 0(0.000)        | [0]        | 0(0.000)        | [0]        | 0(0.000)        | [0]        |
| Femur fracture                                  | 1(1.177)        | [1]         | 0(0.000)        | [0]        | 0(0.000)        | [0]        | 0(0.000)        | [0]        | 0(0.000)        | [0]        | 0(0.000)        | [0]        | 0(0.000)        | [0]        | 0(0.000)        | [0]        |
| Hand fracture                                   | 1(1.177)        | [1]         | 0(0.000)        | [0]        | 0(0.000)        | [0]        | 0(0.000)        | [0]        | 0(0.000)        | [0]        | 0(0.000)        | [0]        | 0(0.000)        | [0]        | 0(0.000)        | [0]        |
| Hip fracture                                    | 1(1.177)        | [1]         | 0(0.000)        | [0]        | 0(0.000)        | [0]        | 0(0.000)        | [0]        | 0(0.000)        | [0]        | 0(0.000)        | [0]        | 0(0.000)        | [0]        | 0(0.000)        | [0]        |
| Joint dislocation                               | 1(1.177)        | [1]         | 0(0.000)        | [0]        | 0(0.000)        | [0]        | 0(0.000)        | [0]        | 0(0.000)        | [0]        | 0(0.000)        | [0]        | 0(0.000)        | [0]        | 0(0.000)        | [0]        |
| Post procedural oedema                          | 1(1.177)        | [1]         | 0(0.000)        | [0]        | 0(0.000)        | [0]        | 0(0.000)        | [0]        | 0(0.000)        | [0]        | 0(0.000)        | [0]        | 0(0.000)        | [0]        | 0(0.000)        | [0]        |
| Radiation skin injury                           | 1(1.177)        | [1]         | 0(0.000)        | [0]        | 0(0.000)        | [0]        | 0(0.000)        | [0]        | 0(0.000)        | [0]        | 0(0.000)        | [0]        | 0(0.000)        | [0]        | 0(0.000)        | [0]        |
| Skin injury                                     | 0(0.000)        | [0]         | 0(0.000)        | [0]        | 0(0.000)        | [0]        | 0(0.000)        | [0]        | 1(1.177)        | [1]        | 0(0.000)        | [0]        | 0(0.000)        | [0]        | 0(0.000)        | [0]        |
| Subdural haemorrhage                            | 0(0.000)        | [0]         | 0(0.000)        | [0]        | 0(0.000)        | [0]        | 0(0.000)        | [0]        | 1(1.177)        | [1]        | 0(0.000)        | [0]        | 0(0.000)        | [0]        | 0(0.000)        | [0]        |
| <b>Vascular disorders</b>                       | <b>8(9.412)</b> | <b>[9]</b>  | <b>0(0.000)</b> | <b>[0]</b> | <b>0(0.000)</b> | <b>[0]</b> | <b>0(0.000)</b> | <b>[0]</b> | <b>4(4.706)</b> | <b>[5]</b> | <b>0(0.000)</b> | <b>[0]</b> | <b>0(0.000)</b> | <b>[0]</b> | <b>0(0.000)</b> | <b>[0]</b> |
| Hypotension                                     | 4(4.706)        | [5]         | 0(0.000)        | [0]        | 0(0.000)        | [0]        | 0(0.000)        | [0]        | 1(1.177)        | [1]        | 0(0.000)        | [0]        | 0(0.000)        | [0]        | 0(0.000)        | [0]        |
| Flushing                                        | 1(1.177)        | [1]         | 0(0.000)        | [0]        | 0(0.000)        | [0]        | 0(0.000)        | [0]        | 2(2.353)        | [2]        | 0(0.000)        | [0]        | 0(0.000)        | [0]        | 0(0.000)        | [0]        |
| Hypertension                                    | 1(1.177)        | [1]         | 0(0.000)        | [0]        | 0(0.000)        | [0]        | 0(0.000)        | [0]        | 2(2.353)        | [2]        | 0(0.000)        | [0]        | 0(0.000)        | [0]        | 0(0.000)        | [0]        |
| Shock                                           | 1(1.177)        | [1]         | 0(0.000)        | [0]        | 0(0.000)        | [0]        | 0(0.000)        | [0]        | 0(0.000)        | [0]        | 0(0.000)        | [0]        | 0(0.000)        | [0]        | 0(0.000)        | [0]        |
| Thrombosis                                      | 1(1.177)        | [1]         | 0(0.000)        | [0]        | 0(0.000)        | [0]        | 0(0.000)        | [0]        | 0(0.000)        | [0]        | 0(0.000)        | [0]        | 0(0.000)        | [0]        | 0(0.000)        | [0]        |
| <b>Ear and labyrinth disorders</b>              | <b>7(8.235)</b> | <b>[12]</b> | <b>0(0.000)</b> | <b>[0]</b> | <b>0(0.000)</b> | <b>[0]</b> | <b>0(0.000)</b> | <b>[0]</b> | <b>4(4.706)</b> | <b>[6]</b> | <b>0(0.000)</b> | <b>[0]</b> | <b>0(0.000)</b> | <b>[0]</b> | <b>0(0.000)</b> | <b>[0]</b> |
| Tinnitus                                        | 3(3.529)        | [3]         | 0(0.000)        | [0]        | 0(0.000)        | [0]        | 0(0.000)        | [0]        | 2(2.353)        | [3]        | 0(0.000)        | [0]        | 0(0.000)        | [0]        | 0(0.000)        | [0]        |
| Ear pain                                        | 2(2.353)        | [2]         | 0(0.000)        | [0]        | 0(0.000)        | [0]        | 0(0.000)        | [0]        | 1(1.177)        | [1]        | 0(0.000)        | [0]        | 0(0.000)        | [0]        | 0(0.000)        | [0]        |
| Otorrhoea                                       | 2(2.353)        | [4]         | 0(0.000)        | [0]        | 0(0.000)        | [0]        | 0(0.000)        | [0]        | 1(1.177)        | [1]        | 0(0.000)        | [0]        | 0(0.000)        | [0]        | 0(0.000)        | [0]        |
| Deafness                                        | 1(1.177)        | [1]         | 0(0.000)        | [0]        | 0(0.000)        | [0]        | 0(0.000)        | [0]        | 1(1.177)        | [1]        | 0(0.000)        | [0]        | 0(0.000)        | [0]        | 0(0.000)        | [0]        |
| Auricular swelling                              | 1(1.177)        | [1]         | 0(0.000)        | [0]        | 0(0.000)        | [0]        | 0(0.000)        | [0]        | 0(0.000)        | [0]        | 0(0.000)        | [0]        | 0(0.000)        | [0]        | 0(0.000)        | [0]        |
| Ear discomfort                                  | 1(1.177)        | [1]         | 0(0.000)        | [0]        | 0(0.000)        | [0]        | 0(0.000)        | [0]        | 0(0.000)        | [0]        | 0(0.000)        | [0]        | 0(0.000)        | [0]        | 0(0.000)        | [0]        |
| <b>Reproductive system and breast disorders</b> | <b>5(5.882)</b> | <b>[6]</b>  | <b>0(0.000)</b> | <b>[0]</b> | <b>0(0.000)</b> | <b>[0]</b> | <b>0(0.000)</b> | <b>[0]</b> | <b>2(2.353)</b> | <b>[2]</b> | <b>0(0.000)</b> | <b>[0]</b> | <b>0(0.000)</b> | <b>[0]</b> | <b>0(0.000)</b> | <b>[0]</b> |
| Vaginal haemorrhage                             | 2(2.353)        | [2]         | 0(0.000)        | [0]        | 0(0.000)        | [0]        | 0(0.000)        | [0]        | 0(0.000)        | [0]        | 0(0.000)        | [0]        | 0(0.000)        | [0]        | 0(0.000)        | [0]        |
| Galactorrhoea                                   | 0(0.000)        | [0]         | 0(0.000)        | [0]        | 0(0.000)        | [0]        | 0(0.000)        | [0]        | 1(1.177)        | [1]        | 0(0.000)        | [0]        | 0(0.000)        | [0]        | 0(0.000)        | [0]        |



|                                                                            |                 |            |                 |            |                 |            |                 |            |                 |            |                 |            |                 |            |                 |            |
|----------------------------------------------------------------------------|-----------------|------------|-----------------|------------|-----------------|------------|-----------------|------------|-----------------|------------|-----------------|------------|-----------------|------------|-----------------|------------|
| Genital discharge                                                          | 1(1.177)        | [1]        | 0(0.000)        | [0]        | 0(0.000)        | [0]        | 0(0.000)        | [0]        | 0(0.000)        | [0]        | 0(0.000)        | [0]        | 0(0.000)        | [0]        | 0(0.000)        | [0]        |
| Menopausal symptoms                                                        | 1(1.177)        | [1]        | 0(0.000)        | [0]        | 0(0.000)        | [0]        | 0(0.000)        | [0]        | 0(0.000)        | [0]        | 0(0.000)        | [0]        | 0(0.000)        | [0]        | 0(0.000)        | [0]        |
| Menorrhagia                                                                | 1(1.177)        | [1]        | 0(0.000)        | [0]        | 0(0.000)        | [0]        | 0(0.000)        | [0]        | 0(0.000)        | [0]        | 0(0.000)        | [0]        | 0(0.000)        | [0]        | 0(0.000)        | [0]        |
| Perineal pain                                                              | 0(0.000)        | [0]        | 0(0.000)        | [0]        | 0(0.000)        | [0]        | 0(0.000)        | [0]        | 1(1.177)        | [1]        | 0(0.000)        | [0]        | 0(0.000)        | [0]        | 0(0.000)        | [0]        |
| Vulvovaginal swelling                                                      | 1(1.177)        | [1]        | 0(0.000)        | [0]        | 0(0.000)        | [0]        | 0(0.000)        | [0]        | 0(0.000)        | [0]        | 0(0.000)        | [0]        | 0(0.000)        | [0]        | 0(0.000)        | [0]        |
| <b>Immune system disorders</b>                                             | <b>1(1.177)</b> | <b>[4]</b> | <b>0(0.000)</b> | <b>[0]</b> | <b>0(0.000)</b> | <b>[0]</b> | <b>0(0.000)</b> | <b>[0]</b> | <b>4(4.706)</b> | <b>[4]</b> | <b>0(0.000)</b> | <b>[0]</b> | <b>0(0.000)</b> | <b>[0]</b> | <b>0(0.000)</b> | <b>[0]</b> |
| Hypersensitivity                                                           | 1(1.177)        | [4]        | 0(0.000)        | [0]        | 0(0.000)        | [0]        | 0(0.000)        | [0]        | 4(4.706)        | [4]        | 0(0.000)        | [0]        | 0(0.000)        | [0]        | 0(0.000)        | [0]        |
| <b>Hepatobiliary disorders</b>                                             | <b>0(0.000)</b> | <b>[0]</b> | <b>0(0.000)</b> | <b>[0]</b> | <b>0(0.000)</b> | <b>[0]</b> | <b>0(0.000)</b> | <b>[0]</b> | <b>4(4.706)</b> | <b>[5]</b> | <b>1(1.177)</b> | <b>[1]</b> | <b>1(1.177)</b> | <b>[1]</b> | <b>0(0.000)</b> | <b>[0]</b> |
| Hepatic steatosis                                                          | 0(0.000)        | [0]        | 0(0.000)        | [0]        | 0(0.000)        | [0]        | 0(0.000)        | [0]        | 2(2.353)        | [2]        | 0(0.000)        | [0]        | 0(0.000)        | [0]        | 0(0.000)        | [0]        |
| Hepatic cirrhosis                                                          | 0(0.000)        | [0]        | 0(0.000)        | [0]        | 0(0.000)        | [0]        | 0(0.000)        | [0]        | 1(1.177)        | [1]        | 0(0.000)        | [0]        | 0(0.000)        | [0]        | 0(0.000)        | [0]        |
| Hepatitis                                                                  | 0(0.000)        | [0]        | 0(0.000)        | [0]        | 0(0.000)        | [0]        | 0(0.000)        | [0]        | 1(1.177)        | [1]        | 0(0.000)        | [0]        | 0(0.000)        | [0]        | 0(0.000)        | [0]        |
| Hepatitis acute                                                            | 0(0.000)        | [0]        | 0(0.000)        | [0]        | 0(0.000)        | [0]        | 0(0.000)        | [0]        | 1(1.177)        | [1]        | 1(1.177)        | [1]        | 1(1.177)        | [1]        | 0(0.000)        | [0]        |
| <b>Cardiac disorders</b>                                                   | <b>3(3.529)</b> | <b>[3]</b> | <b>0(0.000)</b> | <b>[0]</b> | <b>0(0.000)</b> | <b>[0]</b> | <b>0(0.000)</b> | <b>[0]</b> | <b>1(1.177)</b> | <b>[1]</b> | <b>0(0.000)</b> | <b>[0]</b> | <b>0(0.000)</b> | <b>[0]</b> | <b>0(0.000)</b> | <b>[0]</b> |
| Arrhythmia                                                                 | 1(1.177)        | [1]        | 0(0.000)        | [0]        | 0(0.000)        | [0]        | 0(0.000)        | [0]        | 0(0.000)        | [0]        | 0(0.000)        | [0]        | 0(0.000)        | [0]        | 0(0.000)        | [0]        |
| Bradycardia                                                                | 0(0.000)        | [0]        | 0(0.000)        | [0]        | 0(0.000)        | [0]        | 0(0.000)        | [0]        | 1(1.177)        | [1]        | 0(0.000)        | [0]        | 0(0.000)        | [0]        | 0(0.000)        | [0]        |
| Tachycardia                                                                | 1(1.177)        | [1]        | 0(0.000)        | [0]        | 0(0.000)        | [0]        | 0(0.000)        | [0]        | 0(0.000)        | [0]        | 0(0.000)        | [0]        | 0(0.000)        | [0]        | 0(0.000)        | [0]        |
| Ventricular dysfunction                                                    | 1(1.177)        | [1]        | 0(0.000)        | [0]        | 0(0.000)        | [0]        | 0(0.000)        | [0]        | 0(0.000)        | [0]        | 0(0.000)        | [0]        | 0(0.000)        | [0]        | 0(0.000)        | [0]        |
| <b>Endocrine disorders</b>                                                 | <b>0(0.000)</b> | <b>[0]</b> | <b>0(0.000)</b> | <b>[0]</b> | <b>0(0.000)</b> | <b>[0]</b> | <b>0(0.000)</b> | <b>[0]</b> | <b>3(3.529)</b> | <b>[3]</b> | <b>0(0.000)</b> | <b>[0]</b> | <b>0(0.000)</b> | <b>[0]</b> | <b>0(0.000)</b> | <b>[0]</b> |
| Cushing's syndrome                                                         | 0(0.000)        | [0]        | 0(0.000)        | [0]        | 0(0.000)        | [0]        | 0(0.000)        | [0]        | 1(1.177)        | [1]        | 0(0.000)        | [0]        | 0(0.000)        | [0]        | 0(0.000)        | [0]        |
| Cushingoid                                                                 | 0(0.000)        | [0]        | 0(0.000)        | [0]        | 0(0.000)        | [0]        | 0(0.000)        | [0]        | 1(1.177)        | [1]        | 0(0.000)        | [0]        | 0(0.000)        | [0]        | 0(0.000)        | [0]        |
| Thyroid mass                                                               | 0(0.000)        | [0]        | 0(0.000)        | [0]        | 0(0.000)        | [0]        | 0(0.000)        | [0]        | 1(1.177)        | [1]        | 0(0.000)        | [0]        | 0(0.000)        | [0]        | 0(0.000)        | [0]        |
| <b>Neoplasms benign, malignant and unspecified (incl cysts and polyps)</b> | <b>0(0.000)</b> | <b>[0]</b> | <b>0(0.000)</b> | <b>[0]</b> | <b>0(0.000)</b> | <b>[0]</b> | <b>0(0.000)</b> | <b>[0]</b> | <b>1(1.177)</b> | <b>[1]</b> | <b>0(0.000)</b> | <b>[0]</b> | <b>0(0.000)</b> | <b>[0]</b> | <b>0(0.000)</b> | <b>[0]</b> |
| Uterine leiomyoma                                                          | 0(0.000)        | [0]        | 0(0.000)        | [0]        | 0(0.000)        | [0]        | 0(0.000)        | [0]        | 1(1.177)        | [1]        | 0(0.000)        | [0]        | 0(0.000)        | [0]        | 0(0.000)        | [0]        |

Dictionary: MedDRA v16.0

◆ overlapping count
